# Supplementary material for: Experimental modulation of Interleukin 1 shows its key role in chronic kidney disease progression and anemia
Source: PubMed Central journal article supplement (PMC7973507; doi:10.1038/s41598-021-85778-2), 2021-03-18

# Supplementary Materials

## Experimental modulation of Interleukin 1 shows its key role in chronic kidney disease progression and anemia.

Inbar Bandach, Yael Segev, Daniel Landau

### Table of Contents

|                                                                                                                                                                   |      |
|-------------------------------------------------------------------------------------------------------------------------------------------------------------------|------|
| Methods .....                                                                                                                                                     | 2-4  |
| Supplemental Table 1. Summary of experiments .....                                                                                                                | 2    |
| Supplemental Table 2. Primers used for real-time PCR analysis .....                                                                                               | 3-4  |
| Results .....                                                                                                                                                     | 5-12 |
| Supplementary Figure S1. Summary of experiments and main results .....                                                                                            | 5    |
| Supplementary Figure S2. Inflammation phenotype .....                                                                                                             | 6    |
| Supplementary Figure S3. Adenine crystal .....                                                                                                                    | 7    |
| Supplementary Figure S4. Body weight gain (g) of mice on regular (C) or adenine diet, injected with saline (CKD) or an anti-IL1 monoclonal antibody (CKD-Ab)..... | 8    |
| Supplementary Figure S5. Full-length original western blots for STAT 3 and p-STAT 3 referred to in Figure 2I.....                                                 | 9    |
| Supplementary Figure S6. Full-length original western blots for HIF-2 $\alpha$ referred to in Figure 4B.....                                                      | 10   |
| Supplementary Figure S7. Full-length original western blots for STAT 3 and p-STAT 3 referred to in Figure 7H.....                                                 | 11   |
| Supplementary Figure S8. Full-length original western blots for HIF-2 $\alpha$ referred to in Figure 9B.....                                                      | 12   |

Supplemental Table 1. Summary of experiments

| Exp. No. | Group        | Animals                                                               | Diet    | Treatment                                 | Sample size      | Figure numbers                                   |
|----------|--------------|-----------------------------------------------------------------------|---------|-------------------------------------------|------------------|--------------------------------------------------|
| #1       | WT           | BALB/c WT mice                                                        | Control | -                                         | n=6-10/<br>group | Figures 1-3<br>and<br>Supplementary<br>Figure S1 |
|          | WT-CKD       | BALB/c WT mice                                                        | Adenine | -                                         |                  |                                                  |
|          | RaKO         | IL-1 receptor-<br>antagonist knockout<br>mice on BALB/c<br>background | Control | -                                         |                  |                                                  |
|          | RaKO-<br>CKD | IL-1 receptor-<br>antagonist knockout<br>mice on BALB/c<br>background | Adenine | -                                         |                  |                                                  |
| #2       | C            | C57BL/6 mice                                                          | Control | Saline                                    | n=6-10/<br>group | Figures 4-8<br>and<br>Supplementary<br>Figure S2 |
|          | CKD          | C57BL/6 mice                                                          | Adenine | Saline                                    |                  |                                                  |
|          | CKD-Ab       | C57BL/6 mice                                                          | Adenine | anti-IL-1 $\beta$<br>antibody<br>(P2D7KK) |                  |                                                  |

Supplemental Table 2. Primers used for real-time PCR analysis

| Gene           | SENSE                     | ANTI SENSE                   |
|----------------|---------------------------|------------------------------|
| Hif-2 $\alpha$ | AGTAGCCTCTGTGGCTCCAA      | TCCAGGGCATGGTAGAACTC         |
| CRP            | CCATTTCTACACTGCTCTGAGCAC  | CCAAAATATGAGAATGTCGTTAGAGTTC |
| Hepcidin       | CTGAGCAGCACCACTATCTC      | TGGCTCTAGGCTATGTTTTGC        |
| IL-6           | CTATACCACTTCACAAGTCGG AGG | TGCACAACCTCTTTTCTCATTTCC     |
| EPOR           | CAACAGCGGACACATCGAGTT     | TGCGGTGATAGCGAGGAGA          |
| TFR            | CATGAGGGAAATCAATGATCG TA  | GCCCCAGAAGATATGTCCGGAA       |
| c-MYC          | CGGACACACAACGTCTTGAA      | AGGATGTAGGCGGTGGCTTTT        |
| IL1- $\beta$   | ACAACCACGGCCTTCCCTACTT    | CACGATTTCCAGAGAACATGTG       |
| FPN-1          | TCGGTTCCTCTCACTCCT GT     | GTGGAGAGAGAGTGGCCA AG        |
| IRAK-4         | GTCATGACCAGCCGAATCGTG     | CAGACACTGGTCAGCAGCAGA        |
| MYD-88         | CGATTATCTACAGAGCAAGGAATG  | ATAGTGATGAACCGCAGGATAC       |
| TGF- $\beta$   | GCAACATGTGGAACCTCTACCAGA  | GACGTCAAAGACAGCCACTCA        |
| CD-163         | GGGTCATTCAGAGGCACACTG     | CTGGCTGTCCTGTCAAGGCT         |
| CD-11c         | CTGGATAGCCTTTCTTCTGCTG    | GCACACTGTGTCCGAACTC          |

|                |                          |                          |
|----------------|--------------------------|--------------------------|
| F4/80          | CGTCAGGTACGGGATGAATATAAG | CTATGCCATCCACTTCCAAGAT   |
| Ferritin       | GATCAACCTGGAGTTGTATGCC   | CTCCCAGTCATCACGGTCTG     |
| TNF- $\alpha$  | GAATGGGTGTTTCATCCATTCT   | ACATTCGAGGCTCCAGTGAATTCG |
| IL-10          | GTTACTTGGGTTGCCAAG       | TTGATCATCATGTATGCTTC     |
| $\beta$ -Actin | GGTCTCAAACATGATCTGGG     | GGGTCAGAAGAATTCCTATG     |

Supplementary Figure S1. Summary of experiments and main results.

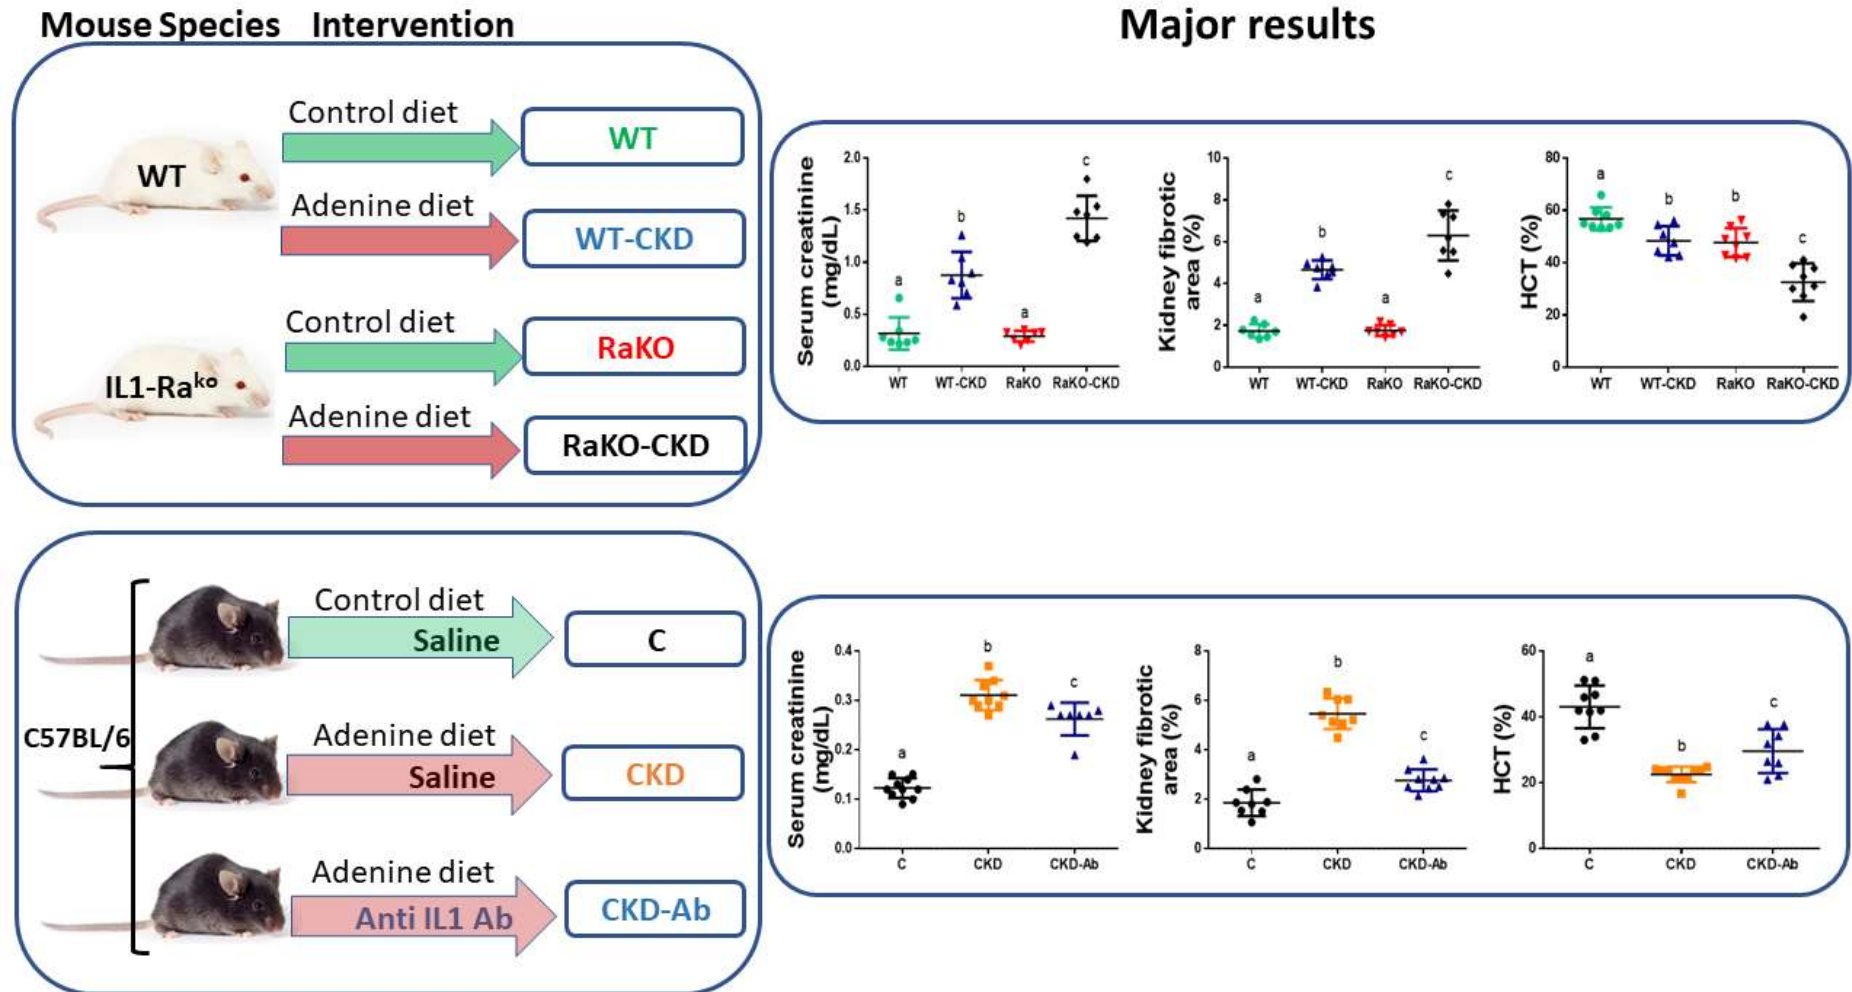

Supplementary Figure S2. Inflammation phenotype. Ankle joints of wild type (WT), WT-CKD, RaKO and RaKO-CKD mouse.

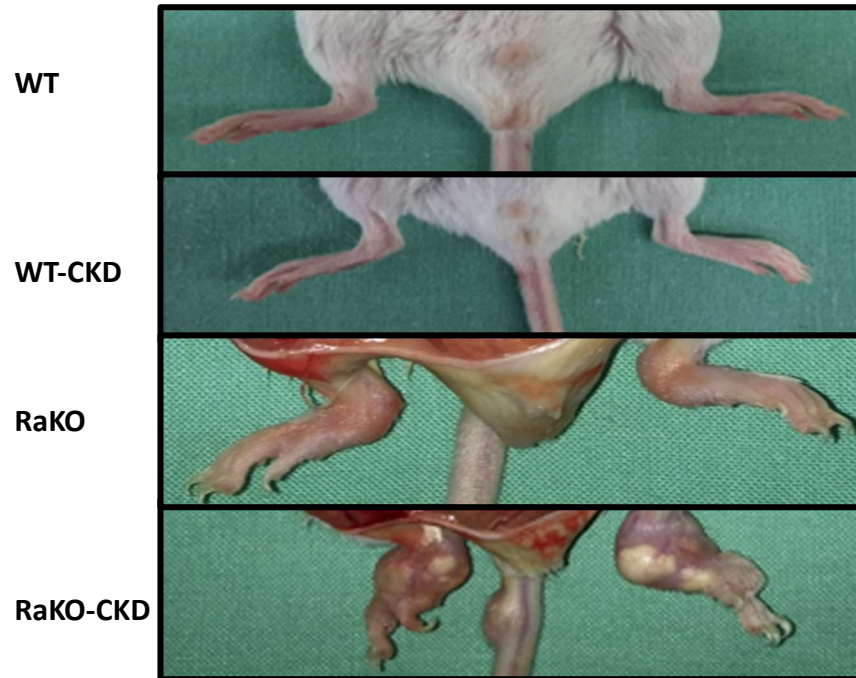

Supplementary Figure S3. Adenine crystal (arrowhead) in hematoxylin & eosin stained histological kidney section from WT-CKD animal.

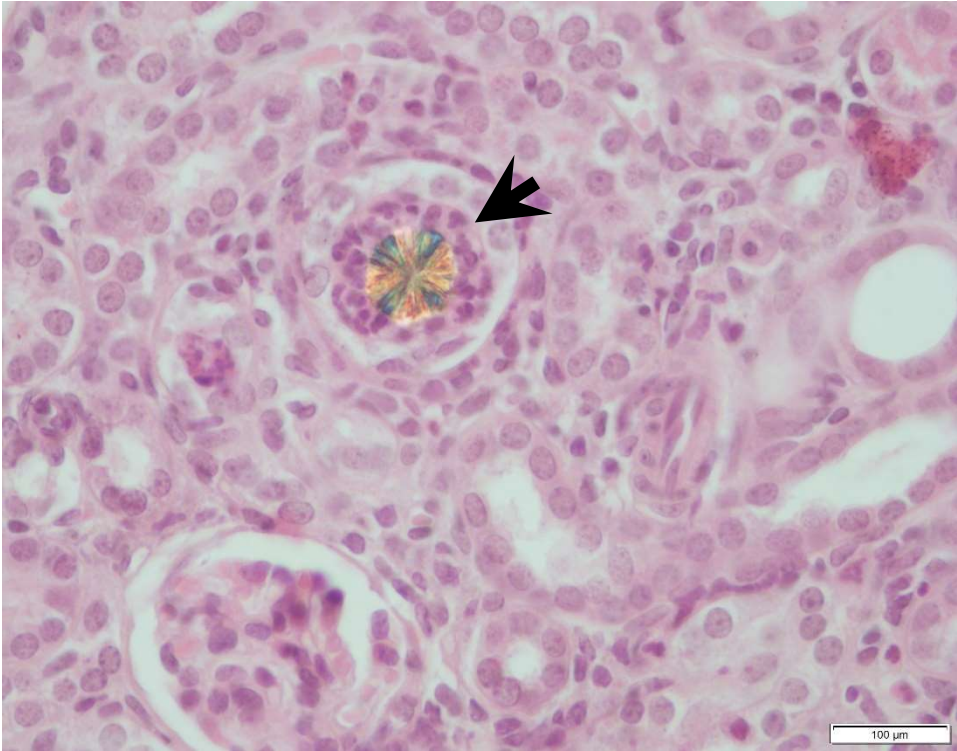

Supplementary Figure S4. Body weight gain (g) of mice on regular (C) or adenine diet, injected with saline (CKD) or an anti-IL1 monoclonal antibody (CKD-Ab).

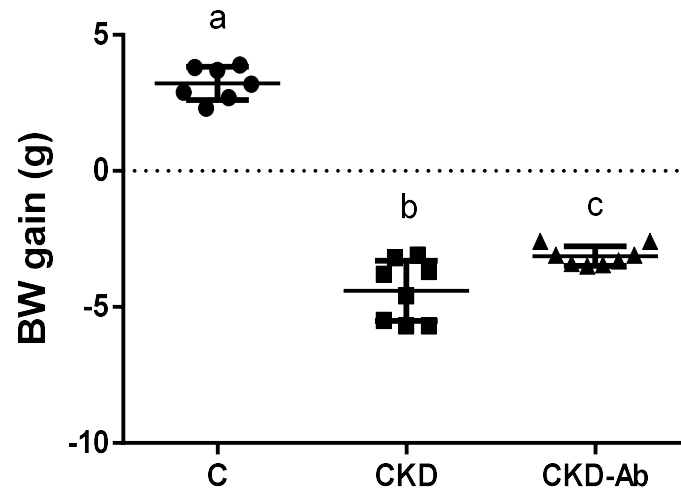



Supplementary Figure S5. Full-length original western blots for STAT 3 and p-STAT 3 referred to in Figure 2I. After the size marker, columns from left to right belong to: WT (1-2), WT-CKD (3-4), RaKO (5-6) and RaKO-CKD (7-8):

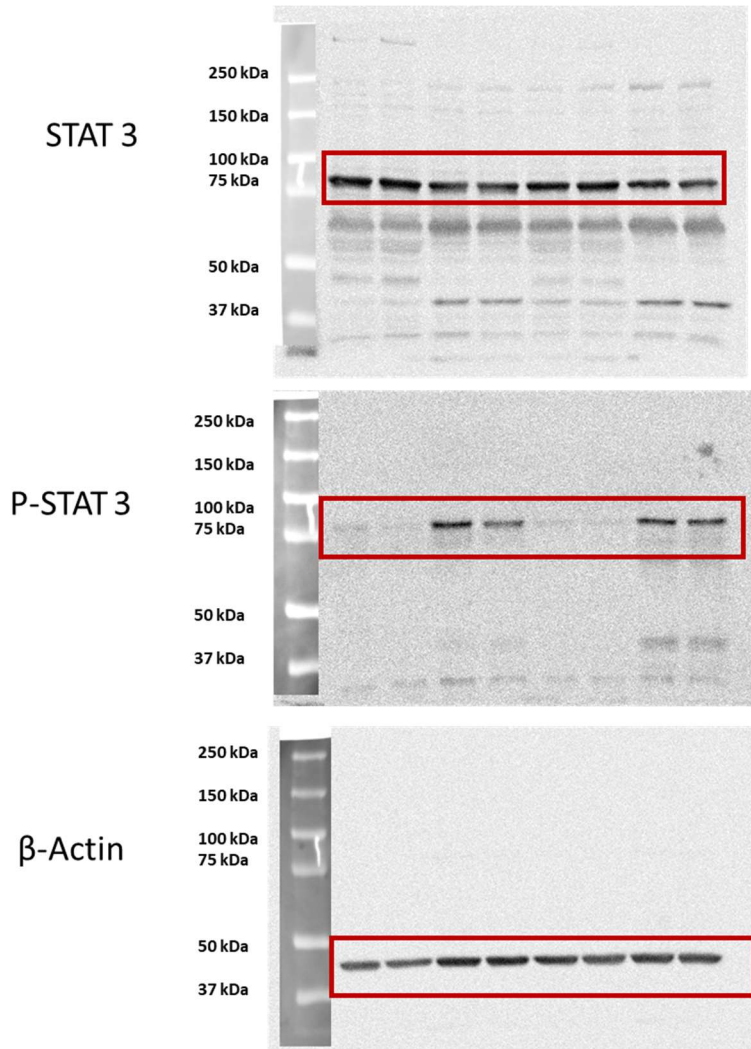

Supplementary Figure S6. Full-length original western blots for HIF-2 $\alpha$  referred to in Figure 4B. After the size marker, columns from left to right belong to: WT (1-2), WT-CKD (3-4), RaKO (5-6) and RaKO-CKD (7-8):

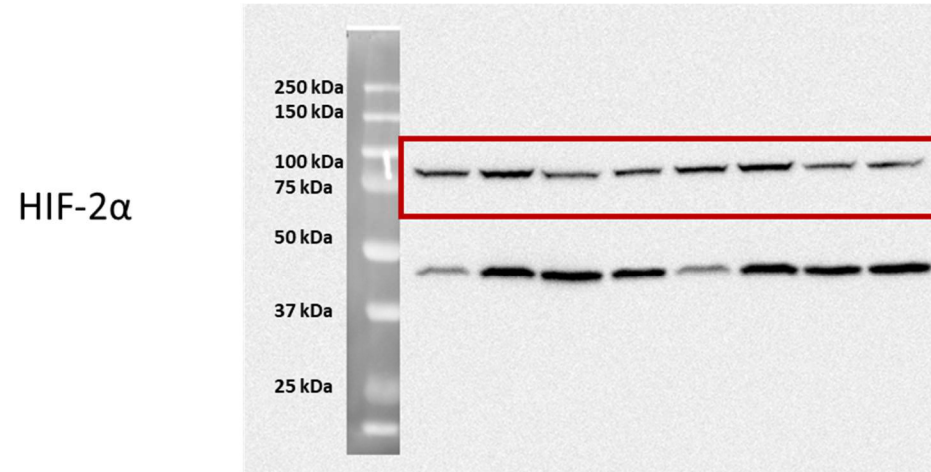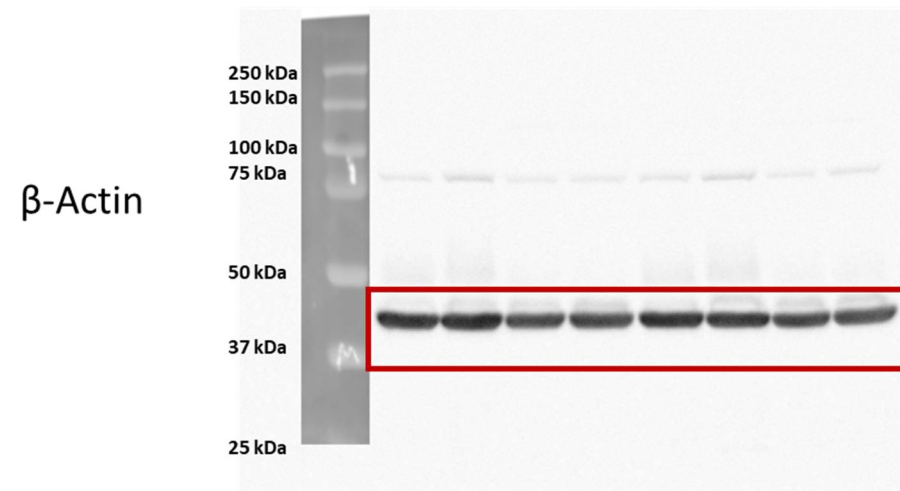

Supplementary Figure S7. Full-length original western blots for STAT 3 and p-STAT 3 and  $\beta$  actin, referred to in Figure 7H. After the size marker, columns from left to right belong to: C (1-3), CKD (4-6), and CKD-Ab (7-9):

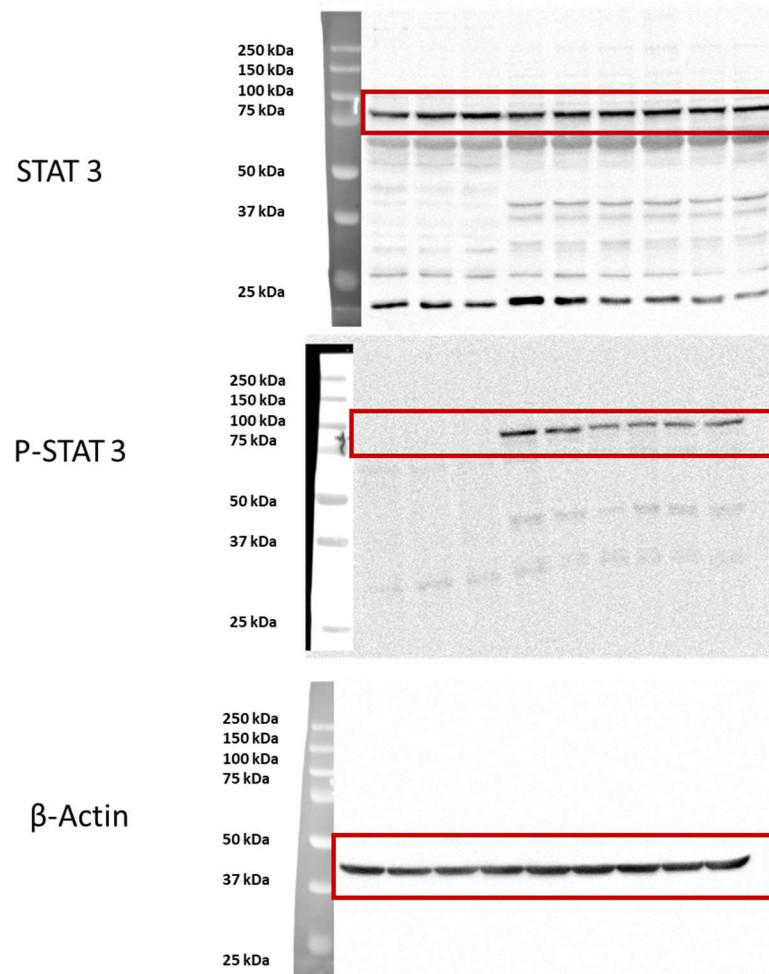

Supplementary Figure S8. Full-length original western blots for HIF-2 $\alpha$  referred to in Figure 9B. After the size marker, columns from left to right belong to: C (1-3), CKD (4-6), and CKD-Ab (7-9):

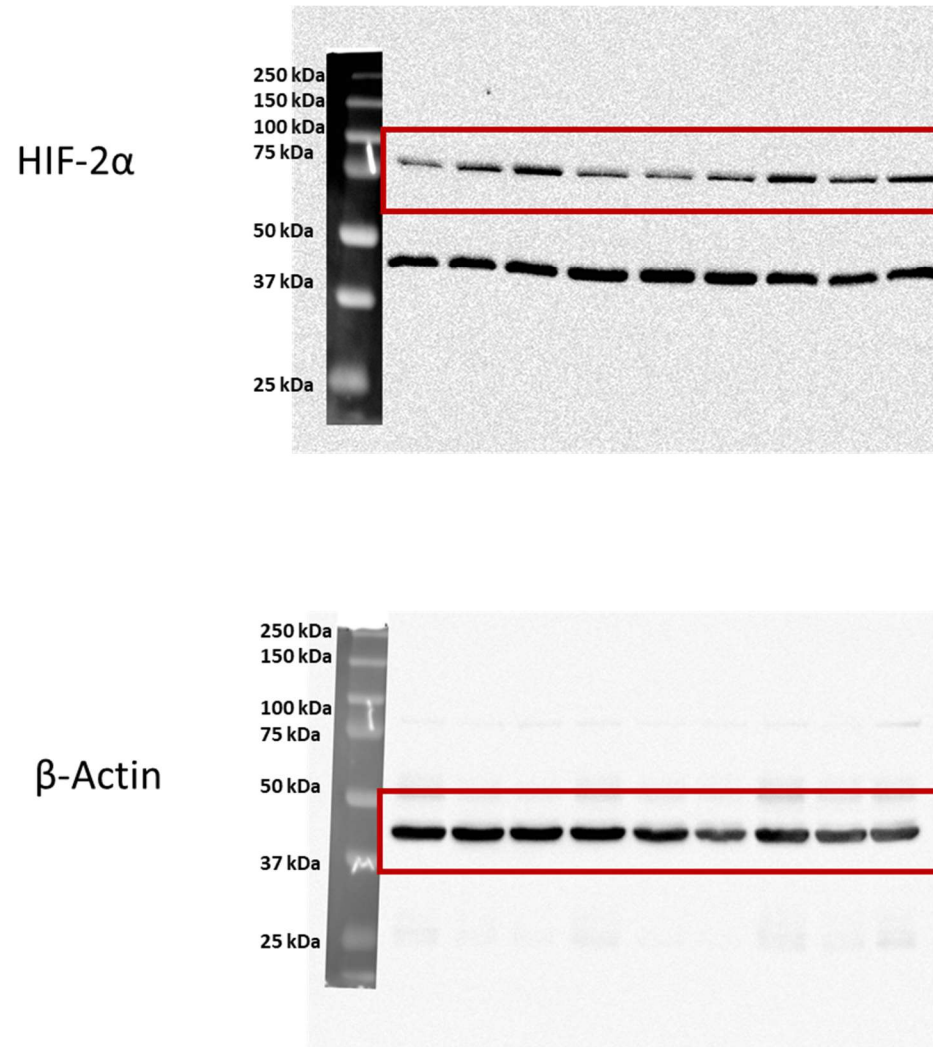

Supplement: 41598_2021_85778_MOESM1_ESM.pdf [file 41598_2021_85778_MOESM1_ESM.pdf]
